# Supplementary material
Source: PubMed Central journal article supplement (PMC4443315)
Supplement: pnas.201501489SI.pdf [file pnas.201501489SI.pdf]

# Supporting Information

Galbraith et al. 10.1073/pnas.1501489112

**Table S1. Species recorded during 10-min point counts at urban study properties in northern Auckland, New Zealand, over an experimental bird feeding study**

| Species                         | Scientific name                     | Primary diet* | Overall richness measures | Community analysis | Species response GLMMs | Occupancy overall (%) |
|---------------------------------|-------------------------------------|---------------|---------------------------|--------------------|------------------------|-----------------------|
| House sparrow <sup>†</sup>      | <i>Passer domesticus</i>            | G             | X                         | X                  | X                      | 96.6                  |
| Eurasian blackbird <sup>†</sup> | <i>Turdus merula</i>                | I, F          | X                         | X                  | X                      | 91.1                  |
| Silvewren                       | <i>Zosterops lateralis</i>          | I, F, N       | X                         | X                  | X                      | 90.8                  |
| Common myna <sup>†</sup>        | <i>Acridotheres tristis</i>         | O             | X                         | X                  | X                      | 87.4                  |
| Tūī                             | <i>Prothemadera novaeseelandiae</i> | N             | X                         | X                  | X                      | 69.3                  |
| Spotted dove <sup>†</sup>       | <i>Streptopelia chinensis</i>       | G             | X                         | X                  | X                      | 65.2                  |
| Common starling <sup>†</sup>    | <i>Sturnus vulgaris</i>             | I, F          | X                         | X                  | X                      | 54.8                  |
| Song thrush <sup>†</sup>        | <i>Turdus philomelos</i>            | I, F          | X                         | X                  | X                      | 48.9                  |
| Eastern rosella <sup>†</sup>    | <i>Platycercus eximius</i>          | G, F, H       | X                         | X                  | X                      | 34.7                  |
| Grey warbler                    | <i>Gerygone igata</i>               | I             | X                         | X                  | X                      | 32.8                  |
| New Zealand fantail             | <i>Rhipidura fuliginosa</i>         | I             | X                         | X                  | X                      | 25.3                  |
| Chaffinch <sup>†</sup>          | <i>Fringilla coelops</i>            | G, I, F       | X                         | X                  | X                      | 16.2                  |
| Welcome swallow                 | <i>Hirundo neoxena</i>              | I             | X                         | X                  | X                      | 11.7                  |
| Goldfinch <sup>†</sup>          | <i>Carduelis carduelis</i>          | G             | X                         | X                  | X                      | 11.6                  |
| New Zealand kingfisher          | <i>Todiramphus sancta</i>           | I, C          | X                         | X                  | X                      | 9.2                   |
| Southern black-backed gull      | <i>Larus dominicanus</i>            | C, O          | X                         | X                  | X                      | 8.4                   |
| Greenfinch <sup>†</sup>         | <i>Carduelis chloris</i>            | G             | X                         | X                  | X                      | 6.4                   |
| New Zealand pigeon              | <i>Hemiphaga novaeseelandiae</i>    | F, H          | X                         | X                  | X                      | 4.4                   |
| Barbary dove <sup>†</sup>       | <i>Streptopelia roseogrisea</i>     | G             | X                         | X                  | X                      | 2.3                   |
| Spur-winged plover              | <i>Vanellus miles</i>               | I             | X                         | X                  | X                      | 2.3                   |
| Red-billed gull                 | <i>Larus novaehollandiae</i>        | I, C          | X                         | X                  | X                      | 2.0                   |
| Shining cuckoo                  | <i>Chrysococcyx lucidus</i>         | I             | X                         | X                  | X                      | 1.7                   |
| Australian magpie <sup>†</sup>  | <i>Gymnorhina tibicen</i>           | I, O          | X                         | X                  | X                      | 1.2                   |
| Yellowhammer <sup>†</sup>       | <i>Emberiza citrinella</i>          | G, I          | X                         | X                  | X                      | 1.0                   |
| Rock pigeon <sup>†</sup>        | <i>Columba livia</i>                | G             | X                         | X                  | X                      | 0.8                   |
| Mallard <sup>†</sup>            | <i>Anas platyrhynchos</i>           | H             | X                         | X                  | X                      | 0.8                   |
| Australasian harrier            | <i>Circus approximans</i>           | C             | X                         | X                  | X                      | 0.5                   |
| Variable oystercatcher          | <i>Haematopus unicolor</i>          | M, I          | X                         | X                  | X                      | 0.5                   |
| Pukeko                          | <i>Porphyrio porphyrio</i>          | H, O          | X                         | X                  | X                      | 0.3                   |
| Californian quail <sup>†</sup>  | <i>Callipepla californica</i>       | G, H, I       | X                         | X                  | X                      | 0.3                   |
| Pheasant <sup>†</sup>           | <i>Phasianus colchicus</i>          | H, G, I       | X                         | X                  | X                      | 0.3                   |
| Pied stilt                      | <i>Himantopus himantopus</i>        | I             | X                         | X                  | X                      | 0.2                   |
| White-faced heron               | <i>Ardea novaehollandiae</i>        | C, I          | X                         | X                  | X                      | 0.0                   |

Species are listed in order of the most frequently observed (given as a percentage of all counts,  $n = 597$ ). An indication of which species have been included for each analysis is also given.

\*Primary dietary component/s [derived from Heather and Robertson (1)]: C, carnivore (vertebrate prey); F, frugivore; G, granivore; H, herbivore; I, insectivore (insect and invertebrate prey); M, molluscivore; N, nectarivore; O, omnivore (broad diet which may include invertebrates, lizards, chicks, eggs, carrion, fruit, seeds, refuse or waste); NB, main dietary component listed first where two or more components given.

<sup>†</sup>Introduced species.

1. Heather B, Robertson H (1996) *The Field Guide to the Birds of New Zealand* (Viking, Auckland).
